# Supplementary material for: Impregnation of KOAc on PdAu/SiO2 causes Pd-acetate formation and metal restructuring
Source: Royal Society of Chemistry journal article supplement (doi:10.1039/d3ta00820g), 2023-01-01
Supplement: d3ta00820g1.pdf [file d3ta00820g1.pdf]

## Electronic Supplementary Information

### Impregnation of KOAc on PdAu/SiO<sub>2</sub> causes Pd-acetate formation and metal restructuring

*Hunter P. Jacobs,<sup>a,‡</sup> Welman C. Elias,<sup>a,‡</sup> Kimberly N. Heck,<sup>a</sup> David P. Dean,<sup>b</sup> Justin J. Dodson,<sup>c</sup>  
Wenqing Zhang,<sup>a</sup> Jacob H. Arredondo,<sup>a</sup> Christian J. Breckner,<sup>b</sup> Kiheon Hong,<sup>d</sup> Christopher R.  
Botello,<sup>a</sup> Laiyuan Chen,<sup>c</sup> Sean G. Mueller,<sup>c</sup> Steven R. Alexander,<sup>c</sup> Jeffrey T. Miller,<sup>b</sup> and Michael  
S. Wong<sup>a,d,e,f\*</sup>*

<sup>a</sup>Department of Chemical and Biomolecular Engineering, Rice University, Houston, TX, 6100  
Main Street, Houston, Texas 77005, USA

<sup>b</sup>Davidson School of Chemical Engineering, Purdue University, 480 Stadium Mall Drive, West  
Lafayette, Indiana 47907, USA

<sup>c</sup>Celanese Corporation, 9502 Bayport Blvd., Pasadena, TX 77507, USA

<sup>d</sup>Department of Civil and Environmental Engineering, Rice University, USA

<sup>e</sup>Department of Materials Science and NanoEngineering, Rice University, USA

<sup>f</sup>Department of Chemistry, Rice University, USA

*<sup>‡</sup>These authors contributed equally to the manuscript.*

**\*Corresponding author: mswong@rice.edu**

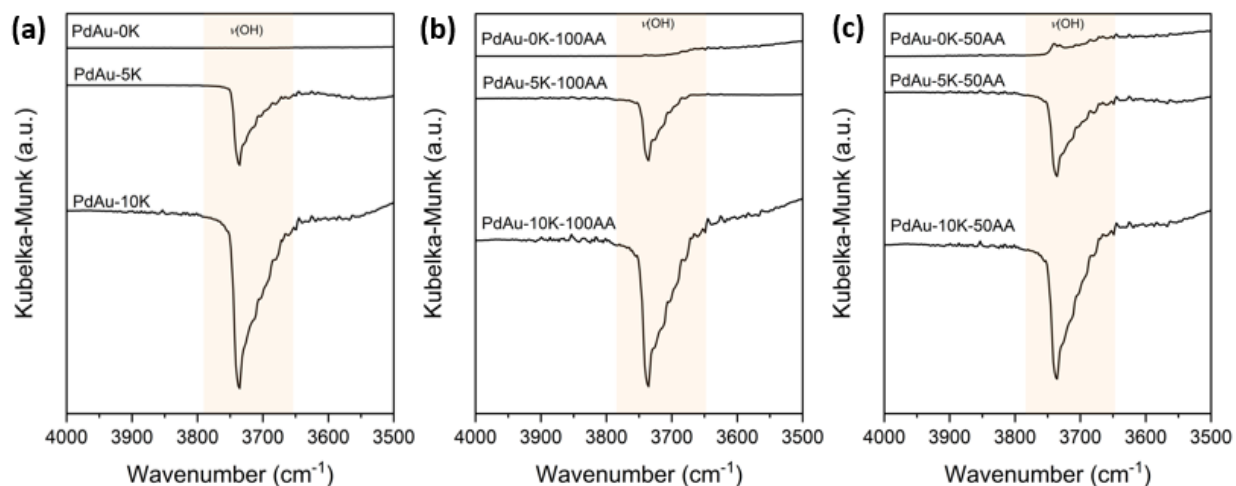

**Figure S1.** DRIFTS spectra in the 4000 – 3500 cm<sup>-1</sup> ν(OH) region of the PdAu/SiO<sub>2</sub> containing 0, 5, and 10 wt% K treated in (a) 0, (b) 100, and (c) 50 vol% AcOH solutions showing negative ν(OH) peaks associated with conversion of isolated silanols to either silyl acetates or alkali silanolates. As-synthesized PdAu/SiO<sub>2</sub> was used as background for all samples.

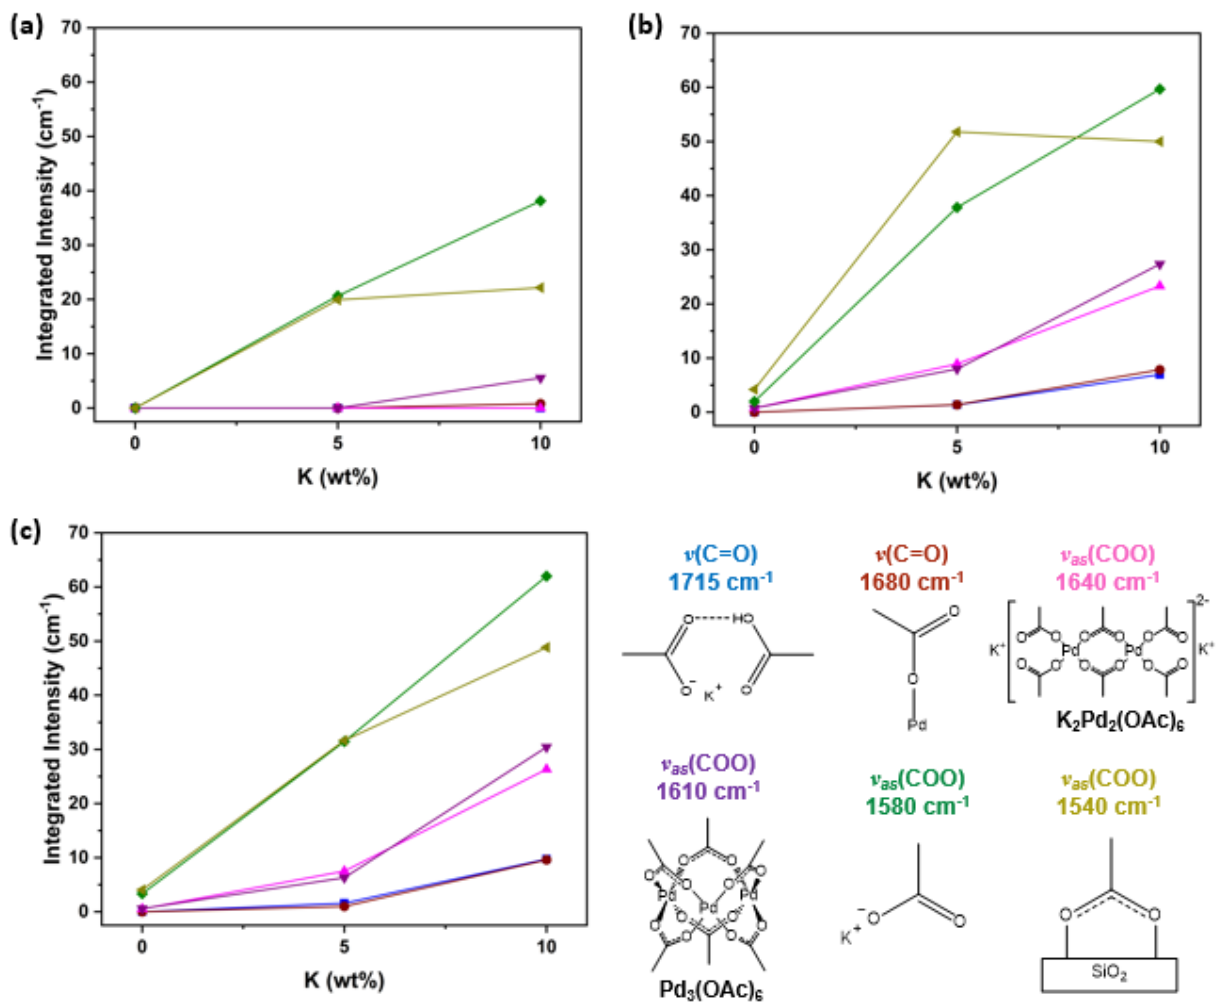

**Figure S2.** Integrated intensities of  $\nu(\text{C}=\text{O})$  and  $\nu_{\text{as}}(\text{COO})$  peaks associated with various Pd-acetates determined by deconvoluted DRIFTS spectra of the PdAu/SiO<sub>2</sub> treated in (a) 0, (b) 100, and (c) 50 vol% AcOH solutions versus K wt% loading.

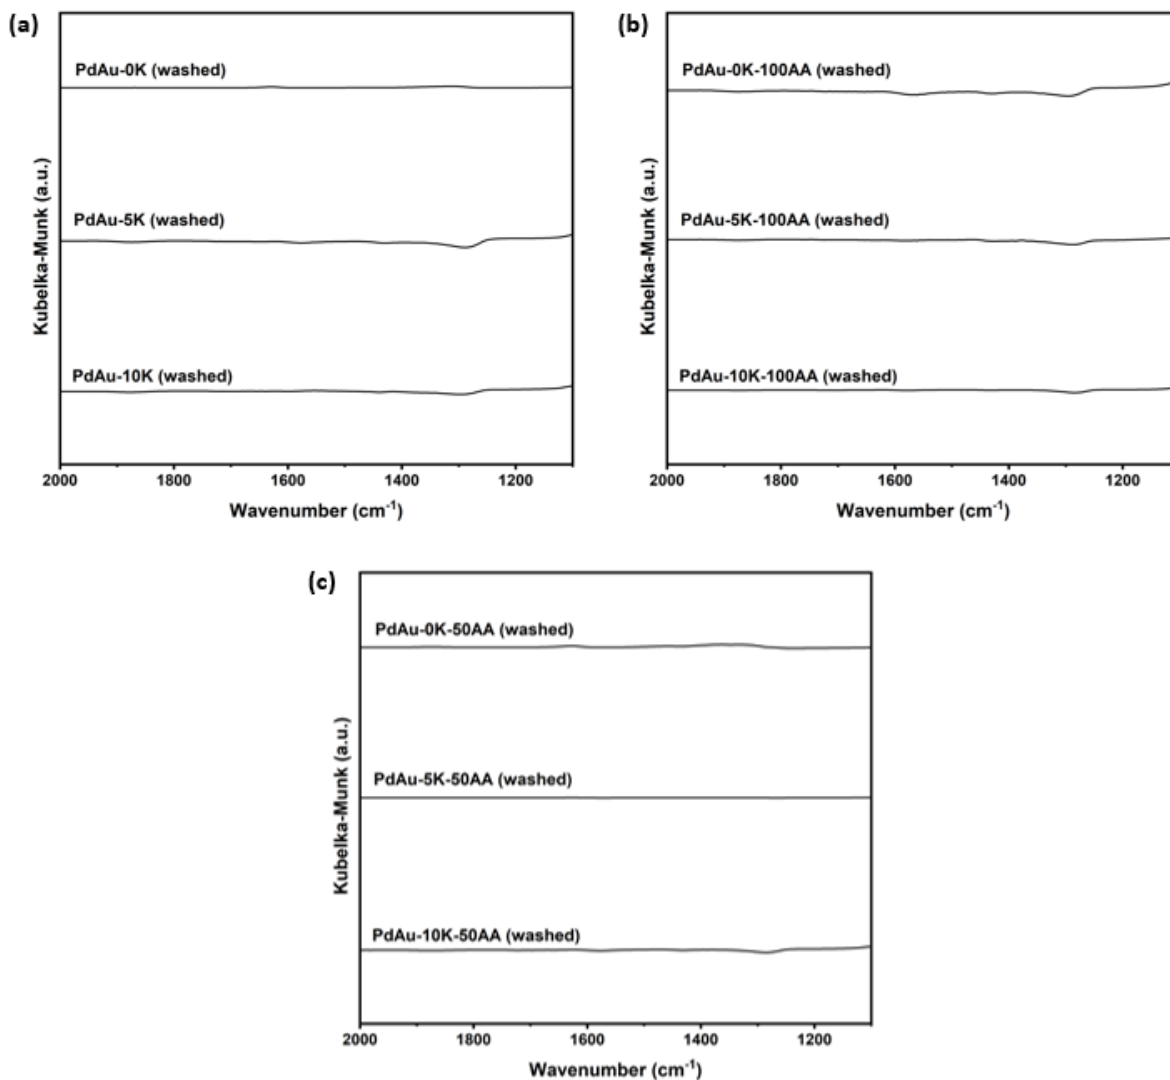

**Figure S3.** DRIFTS spectra in the 2000 – 1100  $\text{cm}^{-1}$  acetate region of the PdAu/SiO<sub>2</sub> containing 0, 5, and 10 wt% K treated in (a) 0, (b) 100, and (c) 50 vol% AcOH solutions after washing with water and drying overnight showing disappearance of acetate vibrational modes. As-synthesized PdAu/SiO<sub>2</sub> was used as background for all samples.

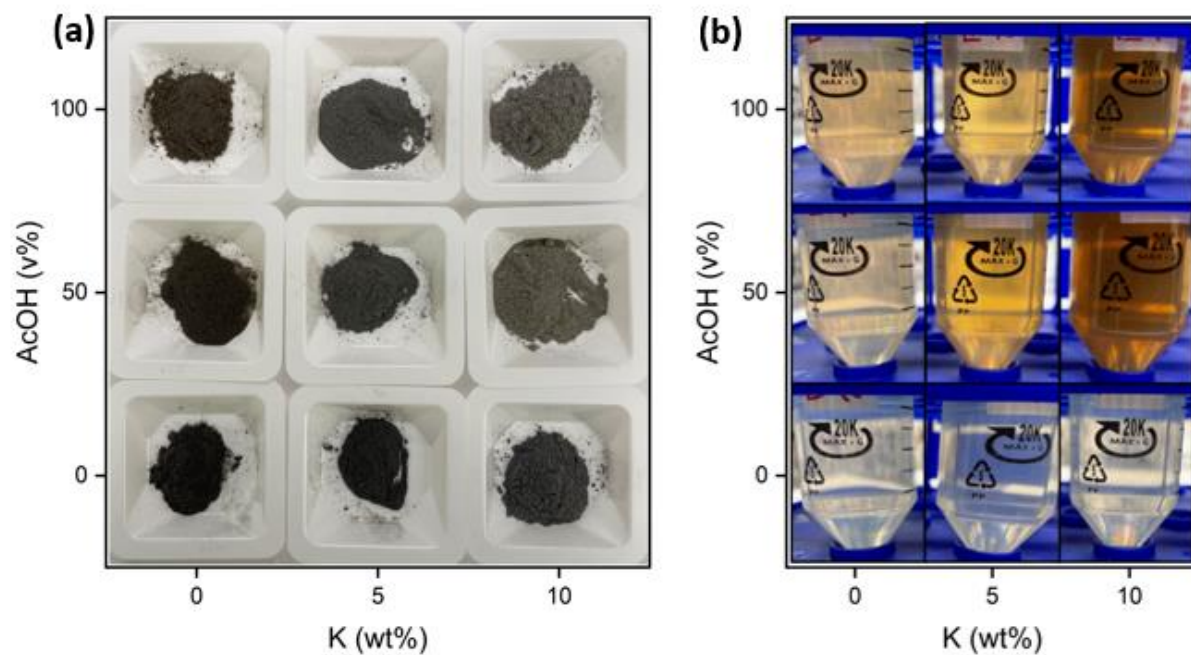

**Figure S4.** (a) PdAu/SiO<sub>2</sub> samples after wet impregnation and (b) filtrate collected after washing PdAu/SiO<sub>2</sub> samples with water showing color change versus AcOH vol% and K wt% loading.

**Table S1.** XANES energy and EXAFS fitting results for samples at Au L<sub>III</sub> edge

| Sample                        | XANES Energy<br>(keV) | Scattering<br>path | CN<br>( $\pm 10\%$ ) | R ( $\text{\AA}$ )<br>( $\pm 0.02 \text{\AA}$ ) | $\Delta\sigma^2$<br>( $\times 10^3 \text{\AA}$ ) | $E_0$<br>(eV) |
|-------------------------------|-----------------------|--------------------|----------------------|-------------------------------------------------|--------------------------------------------------|---------------|
| Au foil                       | 11.9190               | Au-Au              | 12                   | 2.87                                            | 0.0                                              | 3.9           |
| PdAu/SiO <sub>2</sub>         | 11.9181               | Au-Au              | 5.1                  | 2.82                                            | 0.0                                              | 2.4           |
|                               |                       | Au-Pd              | 6.4                  | 2.77                                            | 0.0                                              | 2.7           |
| PdAu-0K <sup>a</sup>          | 11.9180               | Au-Au              | -                    | -                                               | -                                                | -             |
|                               |                       | Au-Pd              | -                    | -                                               | -                                                | -             |
| PdAu-5K                       | 11.9182               | Au-Au              | 5.1                  | 2.79                                            | 0.0                                              | -2.3          |
|                               |                       | Au-Pd              | 6.3                  | 2.76                                            | 0.0                                              | 3.9           |
| PdAu-10K                      | 11.9183               | Au-Au              | 4.9                  | 2.79                                            | 0.0                                              | -1.8          |
|                               |                       | Au-Pd              | 6.4                  | 2.76                                            | 0.0                                              | 3.9           |
| PdAu-0K-50AA                  | 11.9182               | Au-Au              | 4.5                  | 2.79                                            | 0.0                                              | -1.9          |
|                               |                       | Au-Pd              | 6.6                  | 2.77                                            | 0.0                                              | 5.6           |
| PdAu-5K-50AA (a) <sup>a</sup> | 11.9182               | Au-Au              | -                    | -                                               | -                                                | -             |
|                               |                       | Au-Pd              | -                    | -                                               | -                                                | -             |
| PdAu-5K-50AA (b) <sup>a</sup> | 11.9182               | Au-Au              | -                    | -                                               | -                                                | -             |
|                               |                       | Au-Pd              | -                    | -                                               | -                                                | -             |
| PdAu-5K-50AA (c)              | 11.9184               | Au-Au              | 4.3                  | 2.82                                            | 0.0                                              | -0.6          |
|                               |                       | Au-Pd              | 6.0                  | 2.77                                            | 0.0                                              | 4.6           |
| PdAu-10K-50AA <sup>a</sup>    | 11.9182               | Au-Au              | -                    | -                                               | -                                                | -             |
|                               |                       | Au-Pd              | -                    | -                                               | -                                                | -             |
| PdAu-0K-100AA                 | 11.9181               | Au-Au              | 4.6                  | 2.80                                            | 0.0                                              | -2.5          |
|                               |                       | Au-Pd              | 6.5                  | 2.77                                            | 0.0                                              | 4.7           |
| PdAu-5K-100AA                 | 11.9184               | Au-Au              | 5.3                  | 2.80                                            | 0.0                                              | -2.9          |
|                               |                       | Au-Pd              | 6.3                  | 2.76                                            | 0.0                                              | 4.1           |
| PdAu-10K-100AA                | 11.9185               | Au-Au              | 5.7                  | 2.82                                            | 0.0                                              | 0.5           |
|                               |                       | Au-Pd              | 5.7                  | 2.77                                            | 0.0                                              | 3.9           |

<sup>a</sup>Data was too noisy for reliable EXAFS fitting.

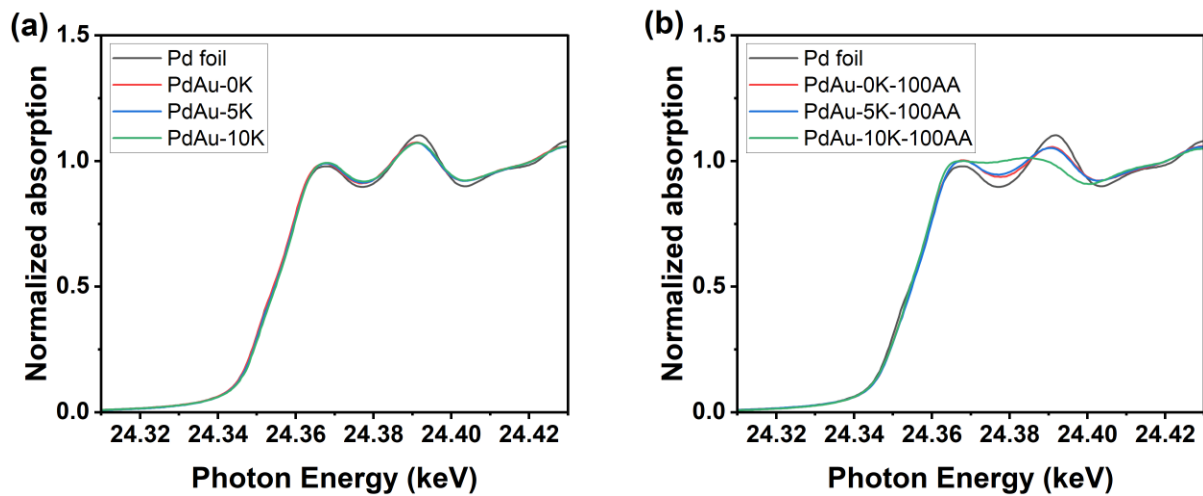

**Figure S5.** Pd K edge XANES for the Pd foil (black) and KOAc-impregnated PdAu/SiO<sub>2</sub> samples containing 0 (red), 5 (blue), and 10 (green) wt% K treated in either (a) water or (b) AcOH solution.

**Table S2.** XANES energy and EXAFS fitting results for samples at Pd K edge

| Sample                | XANES Energy<br>(keV) | Scattering<br>path | CN<br>( $\pm 10\%$ ) | R ( $\text{\AA}$ )<br>( $\pm 0.02 \text{\AA}$ ) | $\Delta\sigma^2$<br>( $\times 10^3 \text{\AA}$ ) | $E_0$<br>(eV) |
|-----------------------|-----------------------|--------------------|----------------------|-------------------------------------------------|--------------------------------------------------|---------------|
| Pd foil               | 24.3503               | Pd-Pd              | 12                   | 2.75                                            | -                                                | -             |
| PdAu/SiO <sub>2</sub> | 24.3508               | Pd-Pd              | 7.7                  | 2.74                                            | 1.0                                              | 2.7           |
|                       |                       | Pd-Au              | 2.4                  | 2.74                                            | 1.0                                              | -1.9          |
| PdAu-0K               | 24.3498               | Pd-Pd              | 7.6                  | 2.75                                            | 1.0                                              | 3.3           |
|                       |                       | Pd-Au              | 2.3                  | 2.75                                            | 1.0                                              | -1.5          |
| PdAu-5K               | 24.3506               | Pd-Pd              | 7.3                  | 2.74                                            | 1.0                                              | 2.6           |
|                       |                       | Pd-Au              | 2.6                  | 2.74                                            | 1.0                                              | -0.9          |
| PdAu-10K              | 24.3511               | Pd-Pd              | 7.4                  | 2.75                                            | 1.0                                              | 3.1           |
|                       |                       | Pd-Au              | 2.6                  | 2.75                                            | 1.0                                              | -1.2          |
| PdAu-0K-50AA          | 24.3502               | Pd-Pd              | 7.1                  | 2.75                                            | 1.0                                              | 2.3           |
|                       |                       | Pd-Au              | 2.4                  | 2.75                                            | 1.0                                              | -2.0          |
| PdAu-5K-50AA (a)      | 24.3519               | Pd-O               | 1.0                  | 2.02                                            | 0.0                                              | -3.6          |
|                       |                       | Pd-Pd              | 6.0                  | 2.75                                            | 1.0                                              | -6.4          |
|                       |                       | Pd-Au              | 1.4                  | 2.75                                            | 1.0                                              | -7.5          |
| PdAu-5K-50AA (b)      | 24.3511               | Pd-O               | 1.3                  | 2.02                                            | 0.0                                              | 6.5           |
|                       |                       | Pd-Pd              | 5.6                  | 2.75                                            | 1.0                                              | 2.1           |
|                       |                       | Pd-Au              | 1.3                  | 2.75                                            | 1.0                                              | -1.0          |
| PdAu-5K-50AA (c)      | 24.3529               | Pd-O               | 1.3                  | 2.02                                            | 0.0                                              | 6.2           |
|                       |                       | Pd-Pd              | 5.3                  | 2.75                                            | 1.0                                              | 2.6           |
|                       |                       | Pd-Au              | 1.2                  | 2.75                                            | 1.0                                              | 3.1           |
| PdAu-10K-50AA         | 24.3537               | Pd-O               | 2.5                  | 2.02                                            | 0.0                                              | 2.1           |
|                       |                       | Pd-Pd              | 3.5                  | 2.75                                            | 1.0                                              | -1.5          |
|                       |                       | Pd-Au              | 0.5                  | 2.75                                            | 1.0                                              | 3.8           |
| PdAu-0K-100AA         | 24.3514               | Pd-O               | 0.9                  | 2.02                                            | 0.0                                              | 5.9           |
|                       |                       | Pd-Pd              | 6.4                  | 2.75                                            | 1.0                                              | 2.9           |
|                       |                       | Pd-Au              | 1.8                  | 2.75                                            | 1.0                                              | 0.0           |
| PdAu-5K-100AA         | 24.3509               | Pd-O               | 1.0                  | 2.02                                            | 0.0                                              | 6.1           |
|                       |                       | Pd-Pd              | 6.2                  | 2.75                                            | 1.0                                              | 1.9           |
|                       |                       | Pd-Au              | 1.4                  | 2.75                                            | 1.0                                              | -1.0          |
| PdAu-10K-100AA        | 24.3535               | Pd-O               | 2.3                  | 2.02                                            | 0.0                                              | 2.9           |
|                       |                       | Pd-Pd              | 3.9                  | 2.75                                            | 1.0                                              | -1.1          |
|                       |                       | Pd-Au              | 0.6                  | 2.75                                            | 1.0                                              | 3.1           |



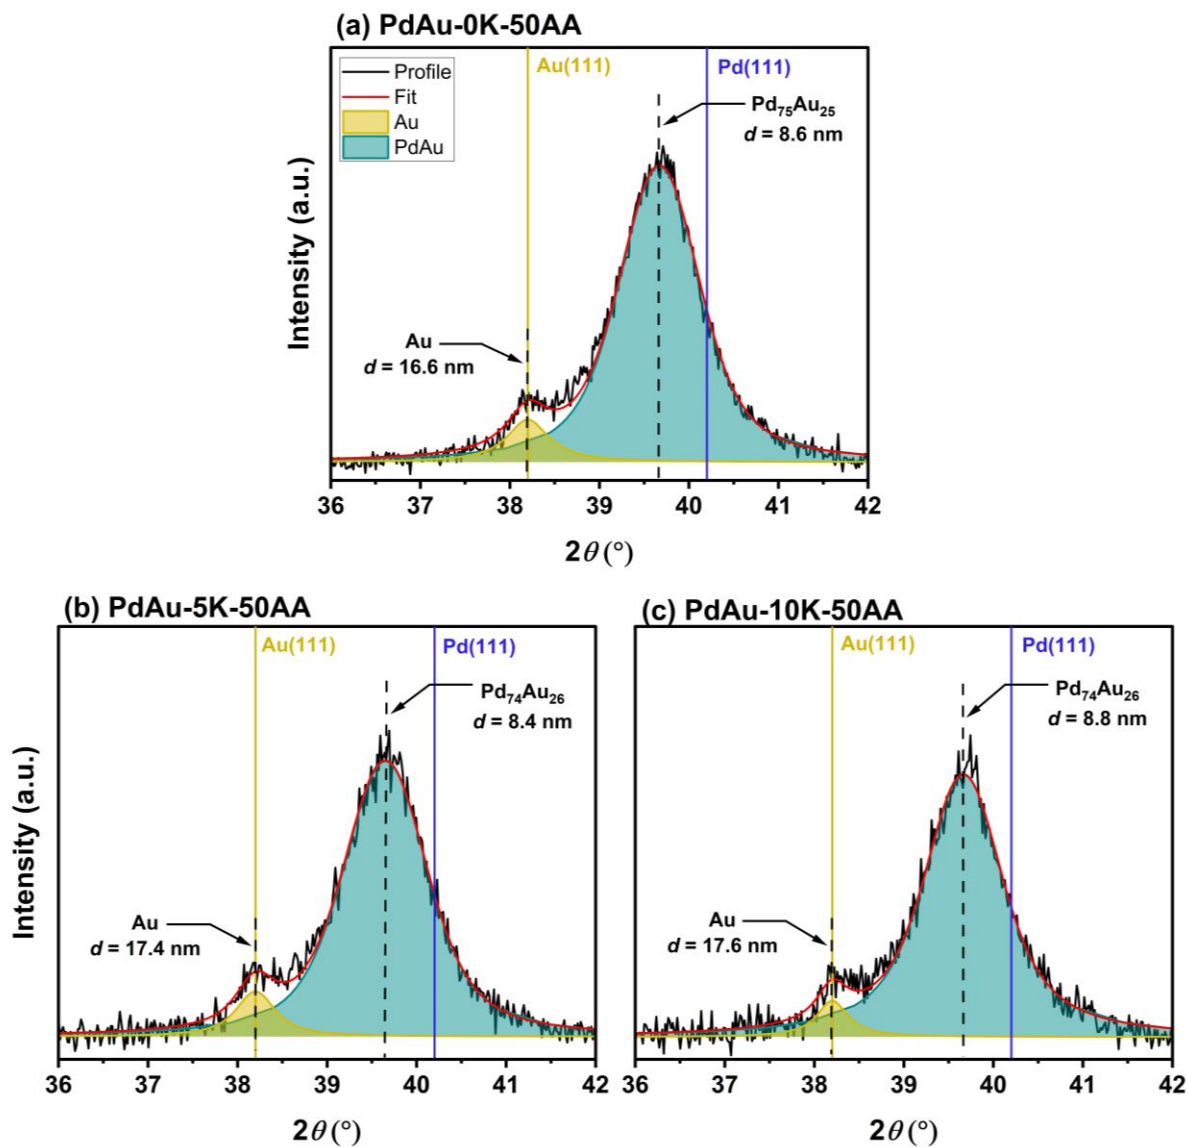

**Figure S6.** XRD profiles of the (a) PdAu/SiO<sub>2</sub> treated in 50 vol% AcOH (PdAu-0K-50AA) and KOAc-impregnated PdAu/SiO<sub>2</sub> treated in 50 vol% AcOH containing (b) 5 wt% K (PdAu-5K-50AA) and (c) 10 wt% K (PdAu-10K-50AA). Blue line represents Pd(111) reference, and the gold line represents Au(111) reference. Green curve represents the Pd-rich PdAu alloy phase, and the gold curve represents pure Au phase.

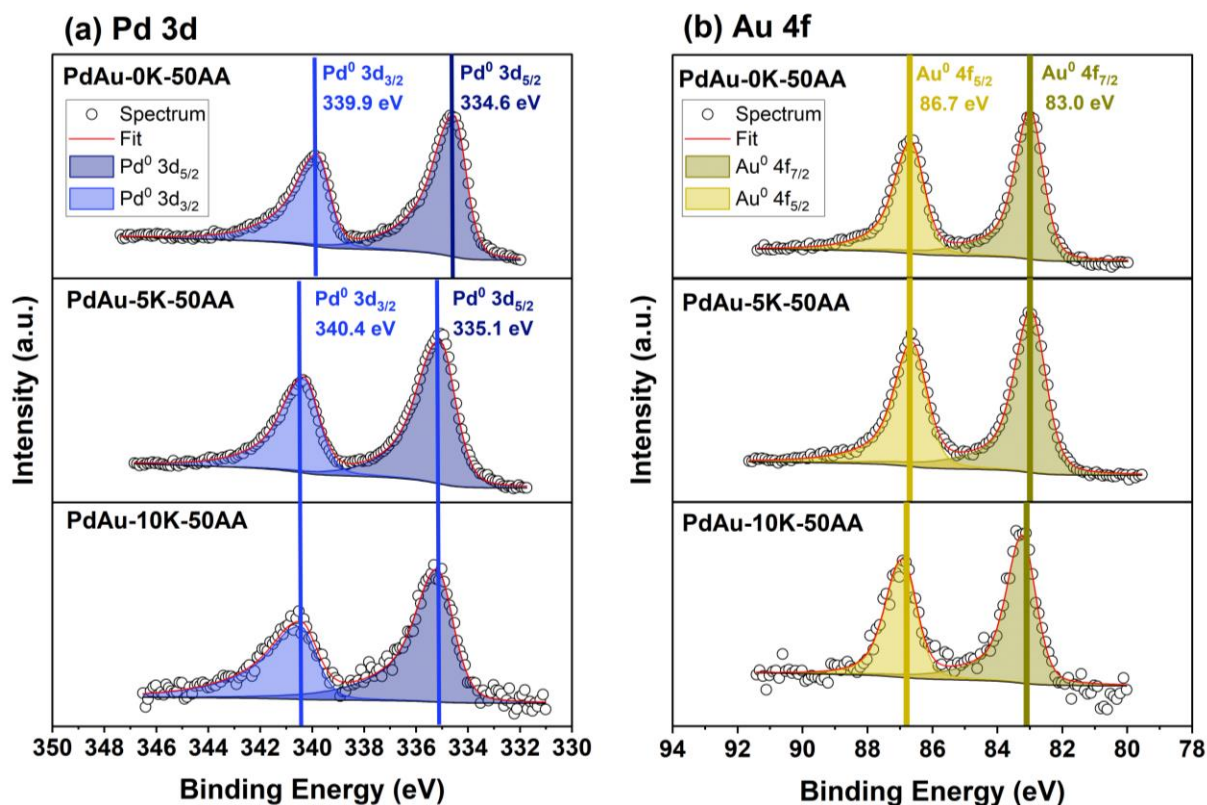

**Figure S7.** XPS spectra at the (a) Pd 3d and (b) Au 4f core levels of the PdAu/SiO<sub>2</sub> treated in 50 vol% AcOH (PdAu-0K-50AA) and KOAc-impregnated PdAu/SiO<sub>2</sub> treated in 50 vol% AcOH containing 5 wt% K (PdAu-5K-50AA) and 10 wt% K (PdAu-10K-50AA). BE values are  $\pm 0.1$  eV.

**Table S3.** Phase compositions, grain sizes, and Pd:Au surface ratio of 50 vol% AcOH/KOAc-treated PdAu/SiO<sub>2</sub>.

| Sample           | Phase composition <sup>a</sup><br>(at%) | Grain size <sup>b</sup><br>(nm) | Pd:Au surface ratio <sup>c</sup><br>(at%) |
|------------------|-----------------------------------------|---------------------------------|-------------------------------------------|
| PdAu-0K-50AA     | Au                                      | 16.4                            | 77:23                                     |
|                  | Pd <sub>75</sub> Au <sub>25</sub>       | 8.6                             |                                           |
| PdAu-5K-50AA (a) | Au                                      | 15.6                            | 73:27                                     |
|                  | Pd <sub>74</sub> Au <sub>26</sub>       | 8.4                             |                                           |
| PdAu-5K-50AA (b) | Au                                      | 19.0                            | 74:26                                     |
|                  | Pd <sub>76</sub> Au <sub>24</sub>       | 8.6                             |                                           |
| PdAu-5K-50AA (c) | Au                                      | 17.4                            | 74:26                                     |
|                  | Pd <sub>76</sub> Au <sub>24</sub>       | 8.3                             |                                           |
| PdAu-10K-50AA    | Au                                      | 17.6                            | 73:27                                     |
|                  | Pd <sub>76</sub> Au <sub>24</sub>       | 8.8                             |                                           |

<sup>a</sup>Calculated from XRD data using Vegard's equation.

<sup>b</sup>Calculated from XRD data using Scherrer's equation.

<sup>c</sup>Calculated from XPS data at Pd 3d and Au 4f core levels.

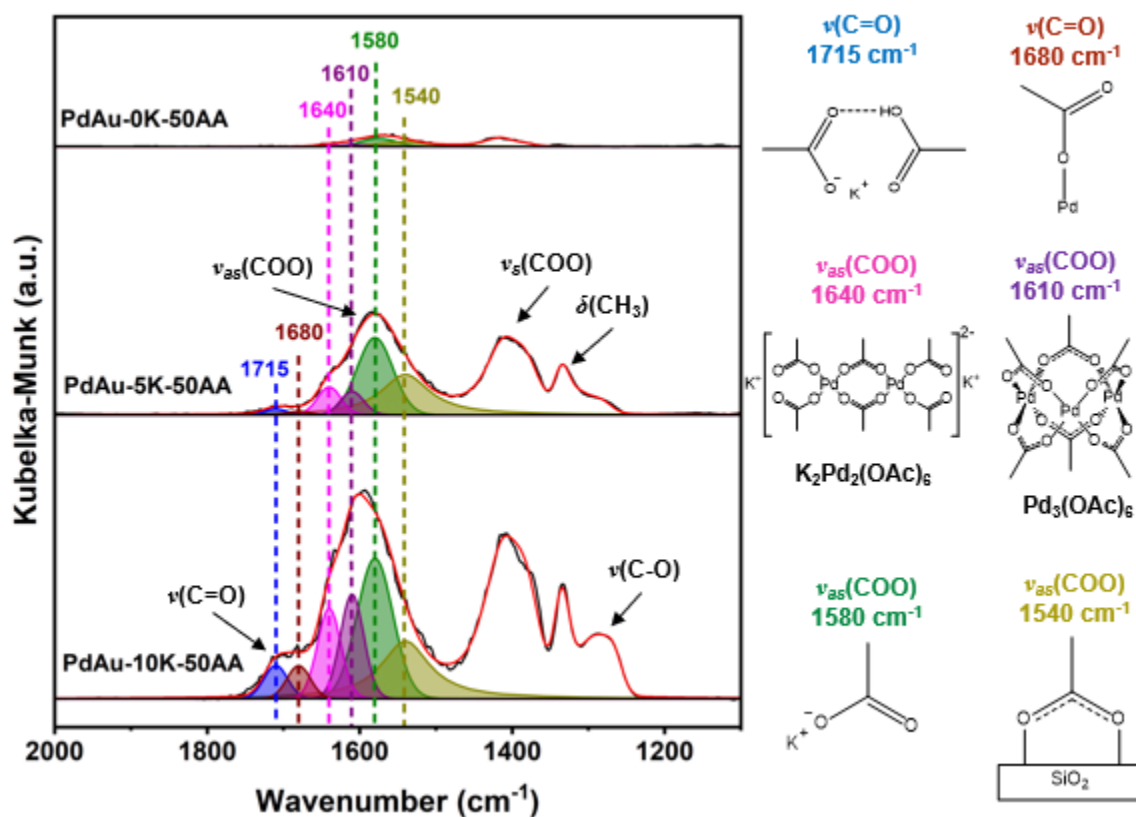

**Figure S8.** Deconvoluted DRIFTS spectra in the 2000 – 1100  $\text{cm}^{-1}$  acetate region of the PdAu/SiO<sub>2</sub> treated in 50 vol% AcOH (PdAu-0K-50AA) and KOAc-impregnated PdAu/SiO<sub>2</sub> treated in 50 vol% AcOH containing 5 wt% K (PdAu-5K-50AA) and 10 wt% K (PdAu-10K-50AA).  $\nu(\text{C}=\text{O})$  peaks are located between 1800 – 1670  $\text{cm}^{-1}$ .  $\nu_{\text{as}}(\text{COO})$  peaks are located between 1670 – 1500  $\text{cm}^{-1}$ .  $\nu_{\text{s}}(\text{COO})$  peaks are located between 1450 – 1390  $\text{cm}^{-1}$ .  $\delta(\text{CH}_3)$  peaks are located between 1390 – 1300  $\text{cm}^{-1}$ .  $\nu(\text{C}-\text{O})$  peaks are located between 1300 – 1250  $\text{cm}^{-1}$ . As-synthesized PdAu/SiO<sub>2</sub> was used as background for all samples.

**Table S4.** ICP-OES analysis of metals recovered in filtrate after washing 50 vol% AcOH/KOAc-treated samples with water.

| Sample           | Pd recovered<br>(% of initial) | Au recovered<br>(% of initial) | K recovered<br>(% of initial) |
|------------------|--------------------------------|--------------------------------|-------------------------------|
| PdAu-0K-50AA     | 4.6                            | 0                              | -                             |
| PdAu-5K-50AA (a) | 15.9                           | 0                              | 99                            |
| PdAu-5K-50AA (b) | 16.0                           | 0                              | 95                            |
| PdAu-5K-50AA (c) | 15.9                           | 0                              | 90                            |
| PdAu-10K-50AA    | 32.3                           | 0                              | 95                            |

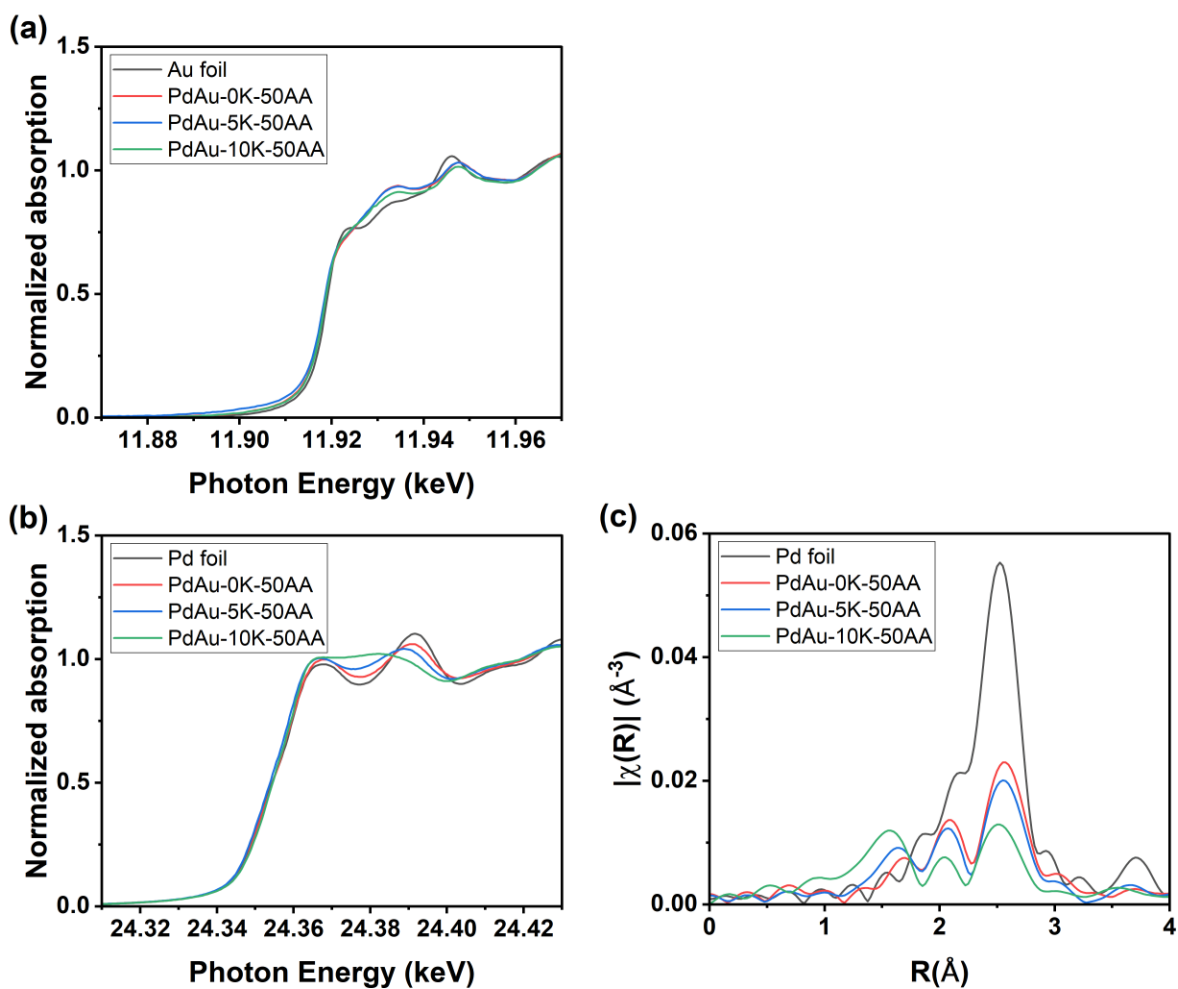

**Figure S9.** (a) Au L<sub>III</sub> edge XANES, (b) Pd K edge XANES, and (c) Pd K edge EXAFS for the Pd foil (black) and KOAc-impregnated PdAu/SiO<sub>2</sub> samples containing 0 (red), 5 (blue), and 10 (green) wt% K treated in 50 vol% AcOH (v/v in water) solution.

## Design of Experiments (DOE) and Statistical Analysis

Statistical analysis based on the design of experiments (DOE) presented in Table 1 of the Main Text was performed on 8 response variables selected from XRD, XPS, DRIFTS, XAS, and ICP-OES data: 1) Au grain size, 2) PdAu grain size, 3) Pd surface content, 4) Pd<sup>2+</sup> content, 5) monodentate acetate content on surface Pd, 6) Pd<sub>3</sub>(OAc)<sub>6</sub> content, 7) K<sub>2</sub>Pd<sub>2</sub>(OAc)<sub>6</sub> content, and 8) Pd loss after washing. The values of the responses are summarized in Tables S5 – S7 based on the AcOH vol% and K wt% treatments for each sample.

Each of the responses were fit using Minitab software based on a least-squares linear regression model containing all linear, quadratic, and interaction effects of the two factors AcOH vol% and K wt% (Equation 3 in the Main Text). The response surface plots are presented in Figures 9 and 10 of the Main Text. The fitting coefficients and their standard errors for all the response surface plots are presented in Tables S8 – S15.

Coded coefficients were also calculated in Minitab by centering and scaling the variables so that the low and high factor levels coded as -1 and 1, respectively. The transformation to coded coefficients is necessary in order to orthogonalize the factors and isolate the factor effects, allowing for relative comparisons between different effects. For example, a larger coded coefficient means that effect has a greater relative contribution to the response surface model. The coded coefficients and their standard errors for each response are also presented in Tables S8 – S15.

The coded coefficients are then used to analyze which effects have statistically significant contributions to the response surface models. The *t*-values for each coefficient are calculated as the ratio between the value of the coefficient and its standard error. The two-tailed *p*-values are then calculated by the following equation:

$$p = 2 * (1 - P(T \leq |t|, d.f.)) \quad (S1)$$

where  $|t|$  is the absolute value of the *t*-value, *d.f.* is the degree of freedom calculated by subtracting the number of coefficients from total number of runs (*d.f.* = 5 for a model with 6 coefficients and 11 runs), and  $P(T \leq |t|, d.f.)$  is the cumulative distribution function for a *t*-distribution at a particular *t*-value and degree of freedom. The calculated *t*-values and *p*-values are included in Tables S8 – S15. At the 95% confidence level ( $\alpha = 0.05$ ) with 5 degrees of freedom,  $p \leq 0.05$  and  $t \geq 2.571$  indicate statistical significance. Plotting the absolute value of the *t*-values in a Pareto chart of the standardized effects offers a visual representation to determine the degree of statistical significance for each factor (Figures S9 – S16).

**Table S5.** Au and Pd<sub>x</sub>Au<sub>y</sub> grain size responses from experimental design.

| Run | Sample           | AcOH<br>(vol%) | K<br>(wt%) | Grain Size (nm) |                                 |
|-----|------------------|----------------|------------|-----------------|---------------------------------|
|     |                  |                |            | Au              | Pd <sub>x</sub> Au <sub>y</sub> |
| 1   | PdAu-0K          | 0              | 0          | 13.4            | 8.3                             |
| 2   | PdAu-5K          | 0              | 5          | 13.4            | 8.1                             |
| 3   | PdAu-10K         | 0              | 10         | 14.4            | 8.1                             |
| 4   | PdAu-0K-50AA     | 50             | 0          | 16.4            | 8.6                             |
| 5   | PdAu-5K-50AA (a) | 50             | 5          | 15.6            | 8.4                             |
| 6   | PdAu-5K-50AA (b) | 50             | 5          | 19.0            | 8.6                             |
| 7   | PdAu-5K-50AA (c) | 50             | 5          | 17.4            | 8.3                             |
| 8   | PdAu-10K-50AA    | 50             | 10         | 17.6            | 8.8                             |
| 9   | PdAu-0K-100AA    | 100            | 0          | 20.2            | 8.6                             |
| 10  | PdAu-5K-100AA    | 100            | 5          | 18.1            | 8.3                             |
| 11  | PdAu-10K-100AA   | 100            | 10         | 14.9            | 8.4                             |

**Table S6.** Pd surface content, Pd<sup>2+</sup> content, and Pd loss responses from experimental design.

| Run | Sample           | AcOH<br>(vol%) | K<br>(wt%) | Pd surface content<br>(at%) | Pd <sup>2+</sup> content<br>(% of Pd) | Pd loss<br>(%) |
|-----|------------------|----------------|------------|-----------------------------|---------------------------------------|----------------|
| 1   | PdAu-0K          | 0              | 0          | 80                          | 0                                     | 0.7            |
| 2   | PdAu-5K          | 0              | 5          | 79                          | 0                                     | 1.7            |
| 3   | PdAu-10K         | 0              | 10         | 77                          | 0                                     | 2.1            |
| 4   | PdAu-0K-50AA     | 50             | 0          | 77                          | 0                                     | 4.5            |
| 5   | PdAu-5K-50AA (a) | 50             | 5          | 73                          | 25                                    | 15.9           |
| 6   | PdAu-5K-50AA (b) | 50             | 5          | 74                          | 32.5                                  | 16.0           |
| 7   | PdAu-5K-50AA (c) | 50             | 5          | 74                          | 32.5                                  | 15.9           |
| 8   | PdAu-10K-50AA    | 50             | 10         | 73                          | 62.5                                  | 32.3           |
| 9   | PdAu-0K-100AA    | 100            | 0          | 79                          | 22.5                                  | 7.4            |
| 10  | PdAu-5K-100AA    | 100            | 5          | 76                          | 25                                    | 11.6           |
| 11  | PdAu-10K-100AA   | 100            | 10         | 68                          | 57.5                                  | 28.4           |

**Table S7.** Pd-acetate responses from experimental design.

| Run | Sample           | AcOH<br>(vol%) | K<br>(wt%) | Integrated Intensity (cm <sup>-1</sup> ) |                                    |                                                   |
|-----|------------------|----------------|------------|------------------------------------------|------------------------------------|---------------------------------------------------|
|     |                  |                |            | Monodentate acetate<br>on surface Pd     | Pd <sub>3</sub> (OAc) <sub>6</sub> | K <sub>2</sub> Pd <sub>2</sub> (OAc) <sub>6</sub> |
| 1   | PdAu-0K          | 0              | 0          | 0.00                                     | 0.00                               | 0.00                                              |
| 2   | PdAu-5K          | 0              | 5          | 0.00                                     | 0.00                               | 0.00                                              |
| 3   | PdAu-10K         | 0              | 10         | 0.81                                     | 5.55                               | 0.00                                              |
| 4   | PdAu-0K-50AA     | 50             | 0          | 0.00                                     | 0.61                               | 0.53                                              |
| 5   | PdAu-5K-50AA (a) | 50             | 5          | 0.98                                     | 6.29                               | 7.51                                              |
| 6   | PdAu-5K-50AA (b) | 50             | 5          | 1.28                                     | 6.31                               | 7.50                                              |
| 7   | PdAu-5K-50AA (c) | 50             | 5          | 1.27                                     | 6.14                               | 7.45                                              |
| 8   | PdAu-10K-50AA    | 50             | 10         | 9.61                                     | 30.4                               | 26.3                                              |
| 9   | PdAu-0K-100AA    | 100            | 0          | 0.00                                     | 0.77                               | 0.77                                              |
| 10  | PdAu-5K-100AA    | 100            | 5          | 1.37                                     | 7.98                               | 8.91                                              |
| 11  | PdAu-10K-100AA   | 100            | 10         | 7.83                                     | 27.3                               | 23.3                                              |

**Table S8.** Uncoded and coded parameters, *t*-values, and *p*-values of each effect for the Au grain size response curve.

| Effect <sup>a</sup> | Uncoded parameters |          | Coded parameters |       | <i>t</i> -value | <i>p</i> -value |
|---------------------|--------------------|----------|------------------|-------|-----------------|-----------------|
|                     | Coeff.             | SE       | Coeff.           | SE    |                 |                 |
| Constant            | 12.49              | 1.26     | 17.282           | 0.728 | 23.74           | 0.000           |
| <i>A</i>            | 0.1307             | 0.0401   | 2.038            | 0.579 | 3.52            | 0.017           |
| <i>B</i>            | 0.303              | 0.401    | -0.508           | 0.579 | -0.88           | 0.421           |
| <i>AA</i>           | -0.000571          | 0.000357 | -1.426           | 0.892 | -1.60           | 0.171           |
| <i>BB</i>           | -0.0076            | 0.0357   | -0.190           | 0.892 | -0.21           | 0.839           |
| <i>AB</i>           | -0.00658           | 0.00284  | -1.644           | 0.710 | -2.32           | 0.068           |

<sup>a</sup>*A* is linear AcOH vol% effect, *B* is linear K wt% effect, *AA* is quadratic AcOH vol% effect, *BB* is quadratic K wt% effect, and *AB* is AcOH vol% and KOAc wt% interaction effect

**Table S9.** Uncoded and coded parameters, *t*-values, and *p*-values of each effect for the PdAu grain size response curve.

| Effect <sup>a</sup> | Uncoded parameters |          | Coded parameters |        | <i>t</i> -value | <i>p</i> -value |
|---------------------|--------------------|----------|------------------|--------|-----------------|-----------------|
|                     | Coeff.             | SE       | Coeff.           | SE     |                 |                 |
| Constant            | 8.206              | 0.131    | 8.4887           | 0.0753 | 112.71          | 0.000           |
| <i>A</i>            | 0.01838            | 0.00415  | 0.1746           | 0.0599 | 2.91            | 0.033           |
| <i>B</i>            | -0.0990            | 0.0415   | -0.0327          | 0.0599 | -0.55           | 0.609           |
| <i>AA</i>           | -0.000145          | 0.000037 | -0.3614          | 0.0922 | -3.92           | 0.011           |
| <i>BB</i>           | 0.00967            | 0.00369  | 0.2417           | 0.0922 | 2.62            | 0.047           |
| <i>AB</i>           | -0.000086          | 0.000294 | -0.0214          | 0.0734 | -0.29           | 0.782           |

<sup>a</sup>*A* is linear AcOH vol% effect, *B* is linear K wt% effect, *AA* is quadratic AcOH vol% effect, *BB* is quadratic K wt% effect, and *AB* is AcOH vol% and KOAc wt% interaction effect

**Table S10.** Uncoded and coded parameters, *t*-values, and *p*-values of each effect for the Pd surface content response curve.

| Effect <sup>a</sup> | Uncoded parameters |          | Coded parameters |       | <i>t</i> -value | <i>p</i> -value |
|---------------------|--------------------|----------|------------------|-------|-----------------|-----------------|
|                     | Coeff.             | SE       | Coeff.           | SE    |                 |                 |
| Constant            | 79.58              | 1.28     | 74.100           | 0.740 | 100.17          | 0.000           |
| <i>A</i>            | -0.1045            | 0.0407   | -2.250           | 0.589 | -3.82           | 0.012           |
| <i>B</i>            | -0.095             | 0.407    | -3.000           | 0.589 | -5.10           | 0.004           |
| <i>AA</i>           | 0.000980           | 0.000362 | 2.450            | 0.906 | 2.70            | 0.043           |
| <i>BB</i>           | -0.0120            | 0.0362   | -0.300           | 0.906 | -0.33           | 0.754           |
| <i>AB</i>           | -0.00770           | 0.00288  | -1.925           | 0.721 | -2.67           | 0.044           |

<sup>a</sup>*A* is linear AcOH vol% effect, *B* is linear K wt% effect, *AA* is quadratic AcOH vol% effect, *BB* is quadratic K wt% effect, and *AB* is AcOH vol% and KOAc wt% interaction effect



**Table S11.** Uncoded and coded parameters, *t*-values, and *p*-values of each effect for the Pd<sup>2+</sup> content response curve.

| Effect <sup>a</sup> | Uncoded parameters |         | Coded parameters |      | <i>t</i> -value | <i>p</i> -value |
|---------------------|--------------------|---------|------------------|------|-----------------|-----------------|
|                     | Coeff.             | SE      | Coeff.           | SE   |                 |                 |
| Constant            | -6.0               | 11.4    | 28.68            | 6.54 | 4.39            | 0.007           |
| <i>A</i>            | 0.743              | 0.360   | 17.50            | 5.20 | 3.36            | 0.020           |
| <i>B</i>            | -0.32              | 3.60    | 16.25            | 5.20 | 3.12            | 0.026           |
| <i>AA</i>           | -0.00568           | 0.00320 | -14.21           | 8.01 | -1.77           | 0.136           |
| <i>BB</i>           | 0.182              | 0.320   | 4.54             | 8.01 | 0.57            | 0.595           |
| <i>AB</i>           | 0.0350             | 0.0255  | 8.75             | 6.37 | 1.37            | 0.228           |

<sup>a</sup>*A* is linear AcOH vol% effect, *B* is linear K wt% effect, *AA* is quadratic AcOH vol% effect, *BB* is quadratic K wt% effect, and *AB* is AcOH vol% and KOAc wt% interaction effect

**Table S12.** Uncoded and coded parameters, *t*-values, and *p*-values of each effect for the monodentate acetate adsorbed on surface Pd response curve.

| Effect <sup>a</sup> | Uncoded parameters |          | Coded parameters |       | <i>t</i> -value | <i>p</i> -value |
|---------------------|--------------------|----------|------------------|-------|-----------------|-----------------|
|                     | Coeff.             | SE       | Coeff.           | SE    |                 |                 |
| Constant            | -0.19              | 1.48     | 1.631            | 0.854 | 1.91            | 0.114           |
| <i>A</i>            | 0.0579             | 0.0470   | 1.400            | 0.680 | 2.06            | 0.095           |
| <i>B</i>            | -0.740             | 0.470    | 3.041            | 0.680 | 4.47            | 0.007           |
| <i>AA</i>           | -0.000650          | 0.000418 | -1.63            | 1.05  | -1.55           | 0.181           |
| <i>BB</i>           | 0.0997             | 0.0418   | 2.49             | 1.05  | 2.38            | 0.063           |
| <i>AB</i>           | 0.00703            | 0.00333  | 1.757            | 0.832 | 2.11            | 0.089           |

<sup>a</sup>*A* is linear AcOH vol% effect, *B* is linear K wt% effect, *AA* is quadratic AcOH vol% effect, *BB* is quadratic K wt% effect, and *AB* is AcOH vol% and KOAc wt% interaction effect

**Table S13.** Uncoded and coded parameters, *t*-values, and *p*-values of each effect for the Pd<sub>3</sub>(OAc)<sub>6</sub> trimer response curve.

| Effect <sup>a</sup> | Uncoded parameters |         | Coded parameters |      | <i>t</i> -value | <i>p</i> -value |
|---------------------|--------------------|---------|------------------|------|-----------------|-----------------|
|                     | Coeff.             | SE      | Coeff.           | SE   |                 |                 |
| Constant            | -0.98              | 3.60    | 7.27             | 2.07 | 3.51            | 0.017           |
| <i>A</i>            | 0.189              | 0.114   | 5.09             | 1.65 | 3.09            | 0.027           |
| <i>B</i>            | -1.67              | 1.14    | 10.32            | 1.65 | 6.26            | 0.002           |
| <i>AA</i>           | -0.00192           | 0.00101 | -4.80            | 2.54 | -1.89           | 0.117           |
| <i>BB</i>           | 0.269              | 0.101   | 6.72             | 2.54 | 2.65            | 0.046           |
| <i>AB</i>           | 0.02102            | 0.00808 | 5.26             | 2.02 | 2.60            | 0.048           |

<sup>a</sup>*A* is linear AcOH vol% effect, *B* is linear K wt% effect, *AA* is quadratic AcOH vol% effect, *BB* is quadratic K wt% effect, and *AB* is AcOH vol% and KOAc wt% interaction effect

**Table S14.** Uncoded and coded parameters, *t*-values, and *p*-values of each effect for the  $K_2Pd_2(OAc)_6$  dimer response curve.

| Effect <sup>a</sup> | Uncoded parameters |         | Coded parameters |      | <i>t</i> -value | <i>p</i> -value |
|---------------------|--------------------|---------|------------------|------|-----------------|-----------------|
|                     | Coeff.             | SE      | Coeff.           | SE   |                 |                 |
| Constant            | -1.21              | 3.69    | 8.41             | 2.12 | 3.96            | 0.011           |
| <i>A</i>            | 0.211              | 0.117   | 5.50             | 1.69 | 3.25            | 0.023           |
| <i>B</i>            | -0.97              | 1.17    | 8.05             | 1.69 | 4.77            | 0.005           |
| <i>AA</i>           | -0.00213           | 0.00104 | -5.34            | 2.60 | -2.05           | 0.095           |
| <i>BB</i>           | 0.145              | 0.104   | 3.63             | 2.60 | 1.40            | 0.221           |
| <i>AB</i>           | 0.02253            | 0.00827 | 5.63             | 2.07 | 2.72            | 0.042           |

<sup>a</sup>*A* is linear AcOH vol% effect, *B* is linear K wt% effect, *AA* is quadratic AcOH vol% effect, *BB* is quadratic K wt% effect, and *AB* is AcOH vol% and KOAc wt% interaction effect

**Table S15.** Uncoded and coded parameters, *t*-values, and *p*-values of each effect for the Pd loss response curve.

| Effect <sup>a</sup> | Uncoded parameters |         | Coded parameters |      | <i>t</i> -value | <i>p</i> -value |
|---------------------|--------------------|---------|------------------|------|-----------------|-----------------|
|                     | Coeff.             | SE      | Coeff.           | SE   |                 |                 |
| Constant            | -0.78              | 4.12    | 16.11            | 2.37 | 6.79            | 0.001           |
| <i>A</i>            | 0.407              | 0.131   | 7.16             | 1.89 | 3.79            | 0.013           |
| <i>B</i>            | -0.42              | 1.31    | 8.36             | 1.89 | 4.42            | 0.007           |
| <i>AA</i>           | -0.00361           | 0.00116 | -9.03            | 2.91 | -3.11           | 0.027           |
| <i>BB</i>           | 0.111              | 0.116   | 2.78             | 2.91 | 0.96            | 0.383           |
| <i>AB</i>           | 0.01952            | 0.00925 | 4.88             | 2.31 | 2.11            | 0.089           |

<sup>a</sup>*A* is linear AcOH vol% effect, *B* is linear K wt% effect, *AA* is quadratic AcOH vol% effect, *BB* is quadratic K wt% effect, and *AB* is AcOH vol% and KOAc wt% interaction effect

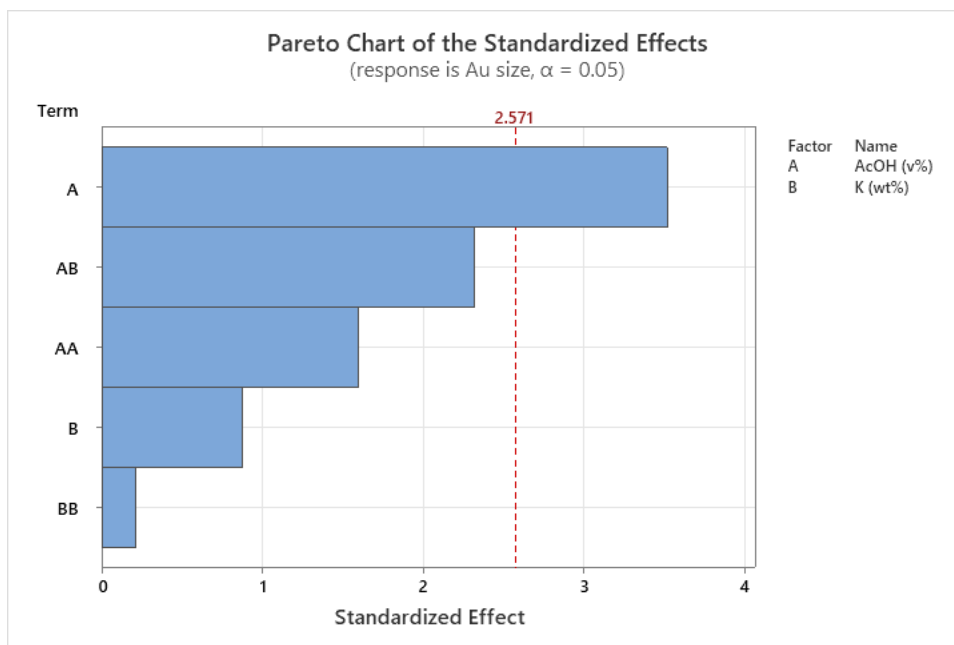

**Figure S10.** Pareto chart of standardized effects for Au grain size response where  $A$  is linear AcOH vol% effect,  $B$  is linear K wt% effect,  $AA$  is quadratic AcOH vol% effect,  $BB$  is quadratic K wt% effect, and  $AB$  is AcOH vol% and KOAc wt% interaction effect ( $d.f. = 5$ ,  $\alpha = 0.05$ ,  $t_{sig} = 2.571$ ).

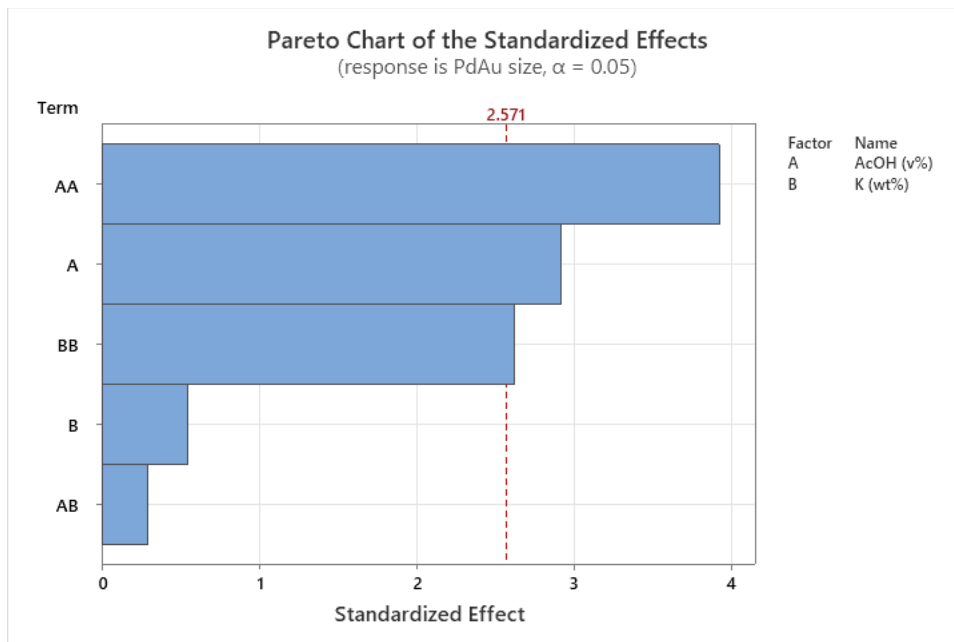

**Figure S11.** Pareto chart of standardized effects for  $\text{Pd}_x\text{Au}_y$  grain size response where  $A$  is linear AcOH vol% effect,  $B$  is linear K wt% effect,  $AA$  is quadratic AcOH vol% effect,  $BB$  is quadratic K wt% effect, and  $AB$  is AcOH vol% and KOAc wt% interaction effect ( $d.f. = 5$ ,  $\alpha = 0.05$ ,  $t_{sig} = 2.571$ ).

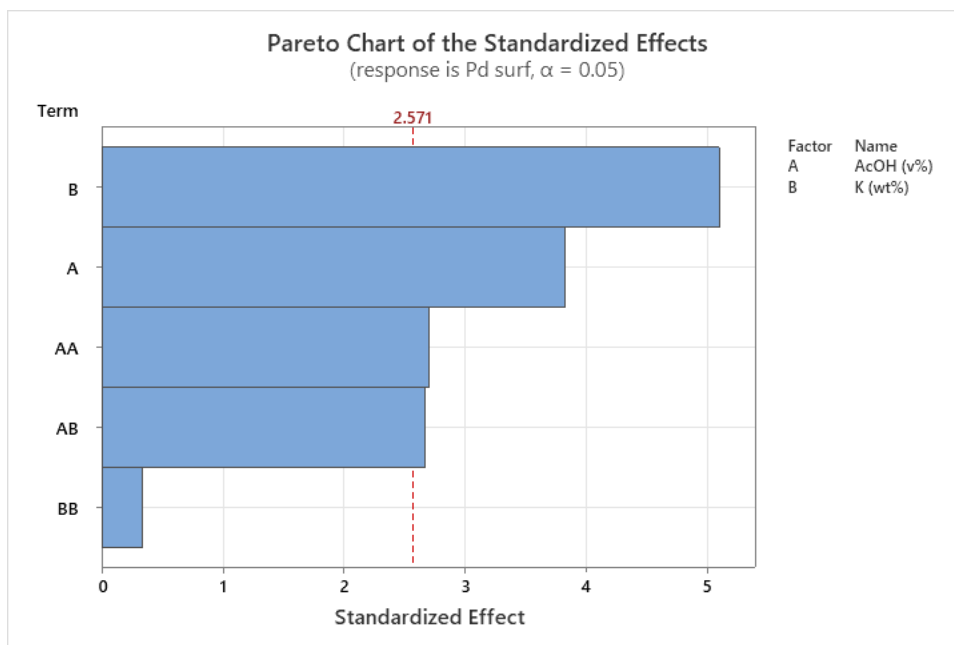

**Figure S12.** Pareto chart of standardized effects for Pd surface content response where  $A$  is linear AcOH vol% effect,  $B$  is linear K wt% effect,  $AA$  is quadratic AcOH vol% effect,  $BB$  is quadratic K wt% effect, and  $AB$  is AcOH vol% and KOAc wt% interaction effect ( $d.f. = 5$ ,  $\alpha = 0.05$ ,  $t_{sig} = 2.571$ ).

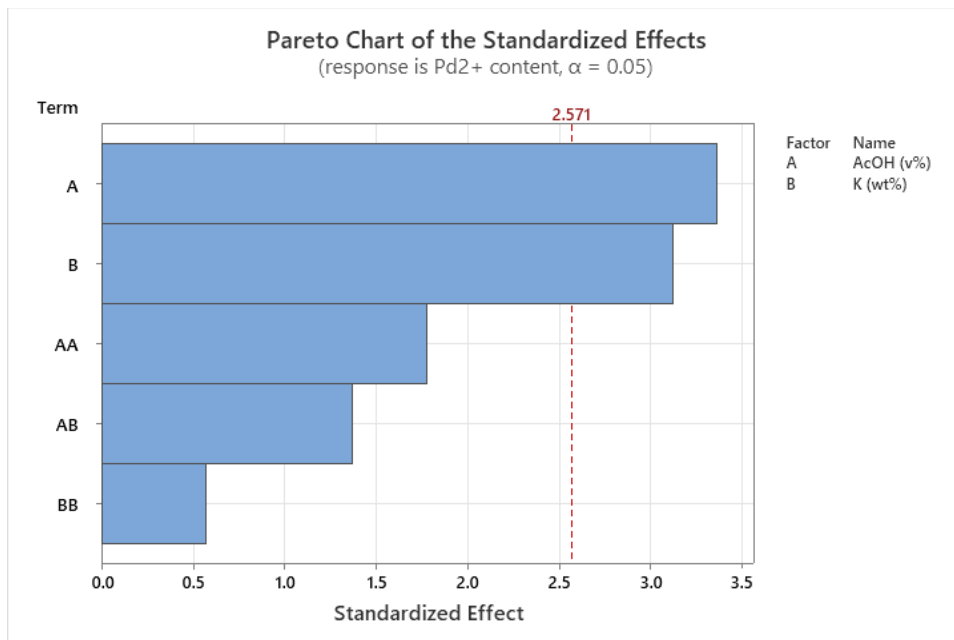

**Figure S13.** Pareto chart of standardized effects for Pd<sup>2+</sup> content response where  $A$  is linear AcOH vol% effect,  $B$  is linear K wt% effect,  $AA$  is quadratic AcOH vol% effect,  $BB$  is quadratic K wt% effect, and  $AB$  is AcOH vol% and KOAc wt% interaction effect ( $d.f. = 5$ ,  $\alpha = 0.05$ ,  $t_{sig} = 2.571$ ).

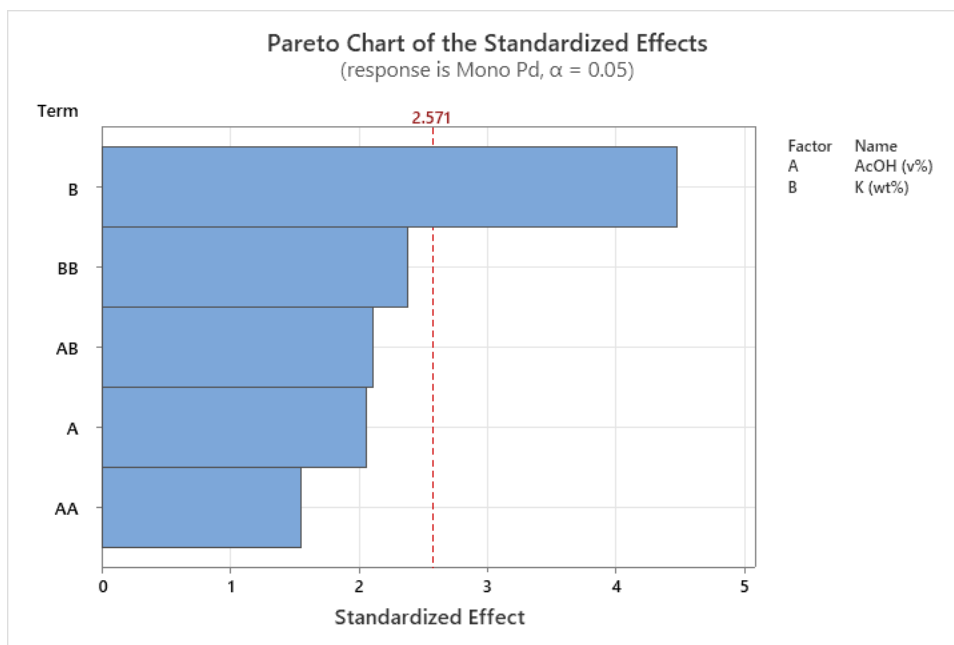

**Figure S14.** Pareto chart of standardized effects for moderate acetate adsorbed on surface Pd response where *A* is linear AcOH vol% effect, *B* is linear K wt% effect, *AA* is quadratic AcOH vol% effect, *BB* is quadratic K wt% effect, and *AB* is AcOH vol% and KOAc wt% interaction effect ( $d.f. = 5$ ,  $\alpha = 0.05$ ,  $t_{sig} = 2.571$ ).

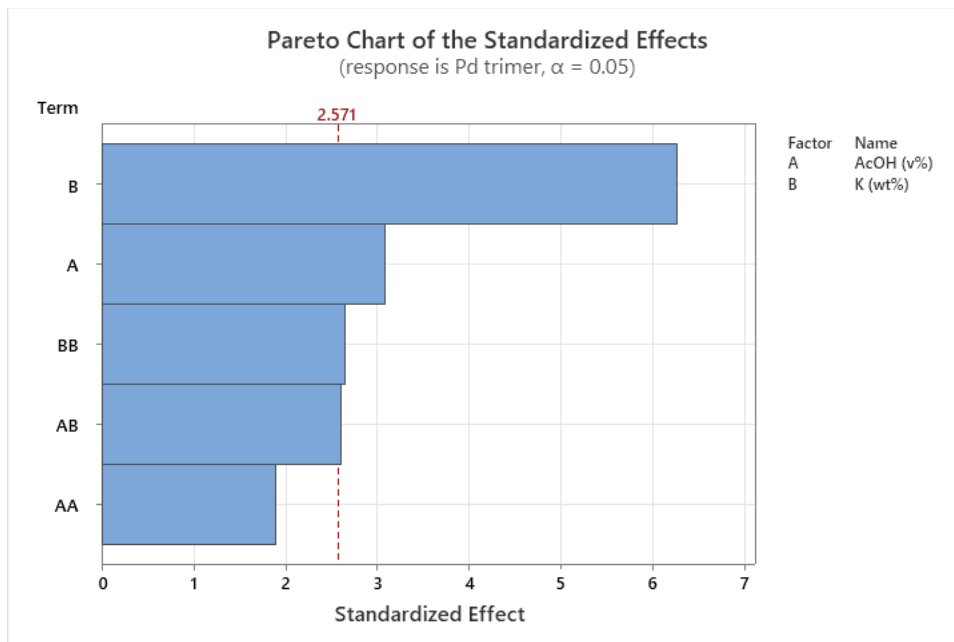

**Figure S15.** Pareto chart of standardized effects for  $\text{Pd}_3(\text{OAc})_6$  response where *A* is linear AcOH vol% effect, *B* is linear K wt% effect, *AA* is quadratic AcOH vol% effect, *BB* is quadratic K wt% effect, and *AB* is AcOH vol% and KOAc wt% interaction effect ( $d.f. = 5$ ,  $\alpha = 0.05$ ,  $t_{sig} = 2.571$ ).

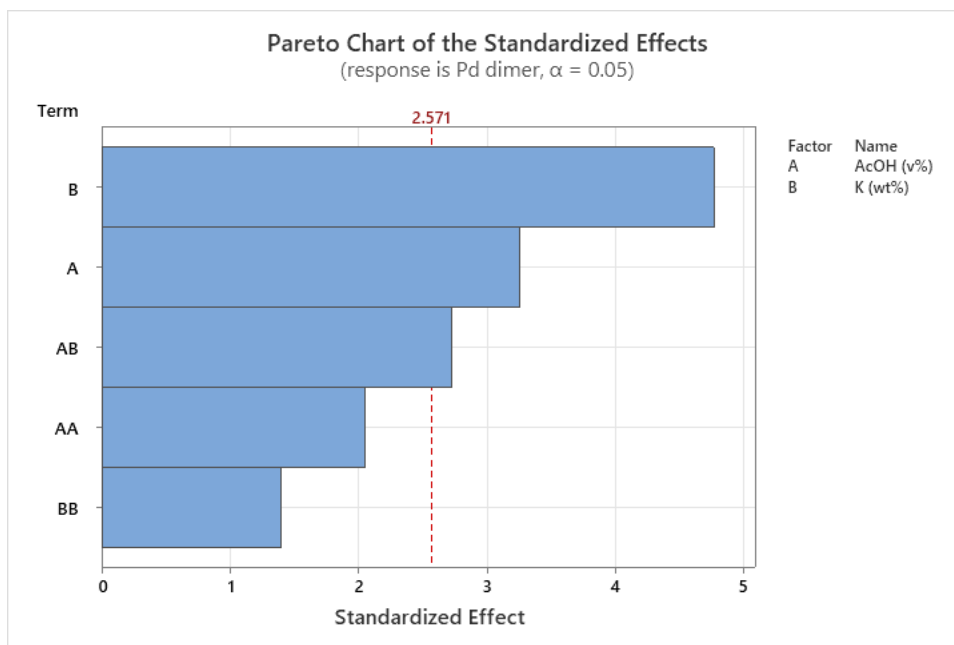

**Figure S16.** Pareto chart of standardized effects for  $K_2Pd_2(OAc)_6$  response where  $A$  is linear AcOH vol% effect,  $B$  is linear K wt% effect,  $AA$  is quadratic AcOH vol% effect,  $BB$  is quadratic K wt% effect, and  $AB$  is AcOH vol% and KOAc wt% interaction effect ( $d.f. = 5$ ,  $\alpha = 0.05$ ,  $t_{sig} = 2.571$ ).

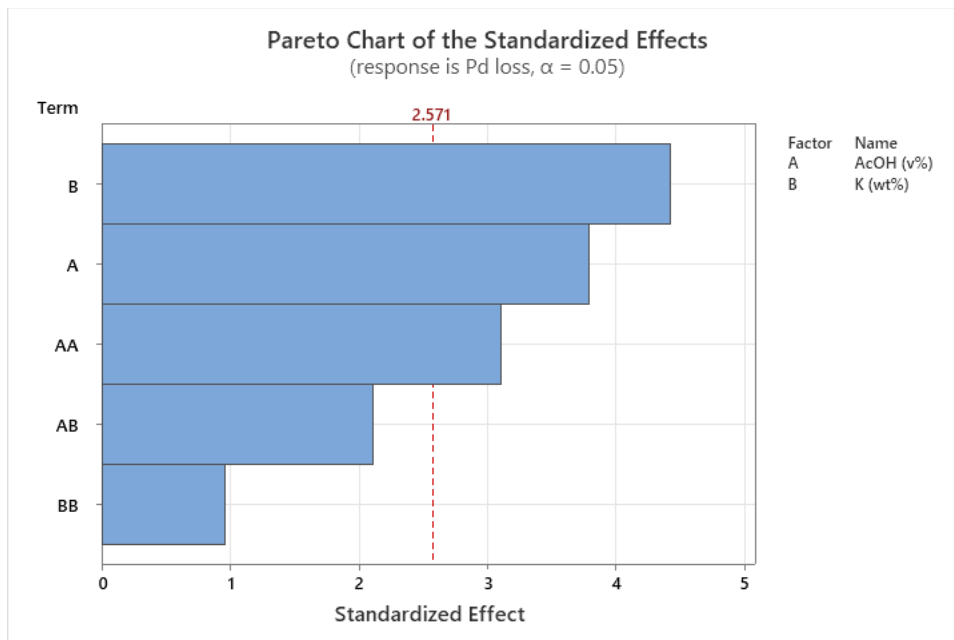

**Figure S17.** Pareto chart of standardized effects for Pd loss response where  $A$  is linear AcOH vol% effect,  $B$  is linear K wt% effect,  $AA$  is quadratic AcOH vol% effect,  $BB$  is quadratic K wt% effect, and  $AB$  is AcOH vol% and KOAc wt% interaction effect ( $d.f. = 5$ ,  $\alpha = 0.05$ ,  $t_{sig} = 2.571$ ).
